# Supplementary material
Source: PubMed Central journal article supplement (PMC2660753)
Supplement: 0900774106_ST1_PDF.pdf [file 0900774106_ST1_PDF.pdf]

# A

## Wild-type Pellino 1 phosphorylated by IRAK4

| Peak | Negative average mass [M-nH] <sup>n-</sup> | Charge state | Start residue | End residue | Peptide sequence                | Phosphorylated residues                    |
|------|--------------------------------------------|--------------|---------------|-------------|---------------------------------|--------------------------------------------|
| T1   | 516.2                                      | 3+           | 73            | 83          | DQHSISYTLRSR                    | Any 3 of Ser76, Ser78, Thr80, Ser82        |
| T1   | 773.8                                      | 2+           | 73            | 83          | DQHSISYTLRSR                    | Any 3 of Ser76, Ser78, Thr80, Ser82        |
| T2   | 733.9                                      | 2+           | 73            | 83          | DQHSISYTLRSR                    | Any 2 of Ser76, Thr80, Ser82               |
| T2   | 1466.6                                     | 1+           | 73            | 83          | DQHSISYTLRSR                    | Any 2 of Ser76, Thr80, Ser82               |
| T3   | 733.8                                      | 2+           | 73            | 83          | DQHSISYTLRSR                    | Any 2 of Ser76, Thr80, Ser82               |
| T3   | 1466.6                                     | 1+           | 73            | 83          | DQHSISYTLRSR                    | Any 2 of Ser76, Thr80, Ser82               |
| T3   | 1030.4                                     | 2+           | 68            | 83          | AISNKDQHSISYTLRSR               | Any 3 of Ser70, Ser76, Ser78, Thr80, Ser82 |
| T3   | 687.3                                      | 3+           | 68            | 83          | AISNKDQHSISYTLRSR               | Any 3 of Ser70, Ser76, Ser78, Thr80, Ser82 |
| T3   | 1070.4                                     | 2+           | 68            | 83          | AISNKDQHSISYTLRSR               | Any 4 of Ser70, Ser76, Ser78, Thr80, Ser82 |
| T4   | 462.9                                      | 3+           | 73            | 83          | DQHSISYTLRSR                    | Ser76                                      |
| T4   | 1386.6                                     | 1+           | 73            | 83          | DQHSISYTLRSR                    | Ser76                                      |
| T4   | 693.8                                      | 2+           | 73            | 83          | DQHSISYTLRSR                    | Ser76                                      |
| T4   | 773.8                                      | 2+           | 73            | 83          | DQHSISYTLRSR                    | Ser76 and Ser 82                           |
| T4   | 660.6                                      | 3+           | 68            | 83          | AISNKDQHSISYTLRSR               | Ser76 and Ser 82                           |
| T4   | 990.4                                      | 2+           | 68            | 83          | AISNKDQHSISYTLRSR               | Ser76 and Ser 82                           |
| T5   | 836.4                                      | 3+           | 84            | 104         | AQTVVVEYTHDSNTDM*FQIGR          | Thr86                                      |
| T5   | 1254.1                                     | 2+           | 84            | 104         | AQTVVVEYTHDSNTDM*FQIGR          | Thr86                                      |
| T5   | 657.3                                      | 3+           | 280           | 295         | PQCPVGFNTLAFPSM*K               | Thr288 and Ser293                          |
| T5   | 985.4                                      | 2+           | 280           | 295         | PQCPVGFNTLAFPSM*K               | Thr288 and Ser293                          |
| T5   | 709.3                                      | 3+           | 280           | 295         | PQCPVGFNTLAFPSM*K               | Thr288 and Ser293                          |
| T5   | 1063.5                                     | 2+           | 280           | 295         | PQCPVGFNTLAFPSM*K               | Thr288 and Ser293                          |
| T5   | 752                                        | 3+           | 280           | 295         | PQCPVGFNTLAFPSM*K               | Thr288 and Ser293                          |
| T6   | 918.1                                      | 3+           | 273           | 295         | QEINAARPQCPVGFNTLAFPSM*K        | Thr288 and Ser293                          |
| T6   | 630.6                                      | 3+           | 280           | 295         | PQCPVGFNTLAFPSM*K               | Thr288 or Ser293                           |
| T6   | 945.4                                      | 2+           | 280           | 295         | PQCPVGFNTLAFPSM*K               | Thr288 or Ser293                           |
| T6   | 1023.5                                     | 2+           | 280           | 295         | PQCPVGFNTLAFPSM*K               | Thr288 or Ser293                           |
| T7   | 891.4                                      | 3+           | 273           | 295         | QEINAARPQCPVGFNTLAFPSM*K        | Thr288                                     |
| T7   | 1336.6                                     | 2+           | 273           | 295         | QEINAARPQCPVGFNTLAFPSM*K        | Thr288                                     |
| T7   | 1414.7                                     | 2+           | 273           | 295         | QEINAARPQCPVGFNTLAFPSM*K        | Thr288 or Ser293                           |
| T7   | 707.8                                      | 4+           | 273           | 295         | QEINAARPQCPVGFNTLAFPSM*K        | Thr288 or Ser293                           |
| T7   | 943.5                                      | 3+           | 273           | 295         | QEINAARPQCPVGFNTLAFPSM*K        | Thr288 or Ser293                           |
| T7   | 945.4                                      | 2+           | 280           | 295         | PQCPVGFNTLAFPSM*K               | Thr288 or Ser293                           |
| T7   | 953.4                                      | 2+           | 280           | 295         | PQCPVGFNTLAFPSM**K              | Thr288 or Ser293                           |
| T7   | 1150.5                                     | 3+           | 105           | 136         | STESPIDFVVDTPVGSQSNSDTQSVQSTISR | Any 1 Ser or Thr                           |
| T8   | 1336.6                                     | 2+           | 273           | 295         | QEINAARPQCPVGFNTLAFPSM*K        | Thr288                                     |
| T8   | 977.4                                      | 2+           | 280           | 295         | PQCPVGFNTLAFPSMK                | Thr288 and Ser293                          |
| T8   | 985.4                                      | 2+           | 280           | 295         | PQCPVGFNTLAFPSM*K               | Thr288 and Ser293                          |
| T9a  | 866.1                                      | 3+           | 273           | 295         | QEINAARPQCPVGFNTLAFPSMK         | Thr288                                     |
| T9a  | 1328.6                                     | 2+           | 273           | 295         | QEINAARPQCPVGFNTLAFPSMK         | Thr288                                     |
| T9a  | 891.4                                      | 3+           | 273           | 295         | QEINAARPQCPVGFNTLAFPSM*K        | Thr288                                     |
| T9a  | 1725.3                                     | 3+           | 105           | 136         | STESPIDFVVDTPVGSQSNSDTQSVQSTISR | Any 1 Ser or Thr                           |
| T9a  | 1150.5                                     | 3+           | 105           | 136         | STESPIDFVVDTPVGSQSNSDTQSVQSTISR | Thr127 or Ser129                           |
| T9a  | 1765.3                                     | 3+           | 105           | 136         | STESPIDFVVDTPVGSQSNSDTQSVQSTISR | Any 2 Ser or Thr                           |
| T9a  | 1177.2                                     | 3+           | 105           | 136         | STESPIDFVVDTPVGSQSNSDTQSVQSTISR | Any 2 Ser or Thr                           |
| T9a  | 625.3                                      | 3+           | 280           | 295         | PQCPVGFNTLAFPSMK                | Thr288                                     |
| T9a  | 937.4                                      | 2+           | 280           | 295         | PQCPVGFNTLAFPSMK                | Thr288                                     |
| T9a  | 945.4                                      | 2+           | 280           | 295         | PQCPVGFNTLAFPSM*K               | Thr288 or Ser293                           |
| T9b  | 1150.2                                     | 3+           | 105           | 136         | STESPIDFVVDTPVGSQSNSDTQSVQSTISR | Any 2 Ser or Thr                           |
| T9b  | 1725.3                                     | 2+           | 105           | 136         | STESPIDFVVDTPVGSQSNSDTQSVQSTISR | Any 2 Ser or Thr                           |
| T9b  | 886.1                                      | 3+           | 273           | 295         | QEINAARPQCPVGFNTLAFPSMK         | Thr288                                     |

# B

## Wild-type Pellino 1 phosphorylated by IRAK1

| Peak | Negative average mass [M-nH] <sup>n</sup> | Charge state | Start residue | End residue | Peptide sequence                       | Phosphorylated residues                    |
|------|-------------------------------------------|--------------|---------------|-------------|----------------------------------------|--------------------------------------------|
| T1   | 773.8                                     | 2+           | 73            | 83          | DQHSISYTL <b>S</b> R                   | Any 3 of Ser76, Ser78, Thr80, Ser82        |
| T2   | 489.5                                     | 3+           | 73            | 83          | DQHSISYTL <b>S</b> R                   | Any 2 of Ser76, Thr80, Ser82               |
| T2   | 733.8                                     | 2+           | 73            | 83          | DQHSISYTL <b>S</b> R                   | Any 2 of Ser76, Thr80, Ser82               |
| T2   | 1466.6                                    | 1+           | 73            | 83          | DQHSISYTL <b>S</b> R                   | Any 2 of Ser76, Thr80, Ser82               |
| T2   | 773.8                                     | 2+           | 73            | 83          | DQHSISYTL <b>S</b> R                   | Ser76, Thr80, Ser82                        |
| T3   | 733.8                                     | 2+           | 73            | 83          | DQHSISYTL <b>S</b> R                   | Any 2 of Ser76, Ser78, Thr80, Ser82        |
| T3   | 687.3                                     | 3+           | 68            | 83          | AISNKDQHSISYTL <b>S</b> R              | Any 3 of Ser70, Ser76, Ser78, Thr80, Ser82 |
| T4   | 462.9                                     | 3+           | 73            | 83          | DQHSISYTL <b>S</b> R                   | Ser76 or Thr80                             |
| T4   | 693.8                                     | 2+           | 73            | 83          | DQHSISYTL <b>S</b> R                   | Ser76 or Thr80                             |
| T4   | 733.8                                     | 2+           | 73            | 83          | DQHSISYTL <b>S</b> R                   | Ser76 and Thr80                            |
| T4   | 660.6                                     | 3+           | 68            | 83          | AISNKDQHSISYTL <b>S</b> R              | Ser76 and Thr80                            |
| T4   | 990.4                                     | 2+           | 68            | 83          | AISNKDQHSISYTL <b>S</b> R              | Ser76 and Thr80                            |
| T5   | 660.6                                     | 3+           | 68            | 83          | AISNKDQHSISYTL <b>S</b> R              | Ser76 and Thr80                            |
| T5   | 836.4                                     | 3+           | 84            | 104         | AQTVVVEYTHDSNTDMFQIGR                  | Thr86                                      |
| T5   | 1254.1                                    | 2+           | 68            | 83          | AISNKDQHSISYTL <b>S</b> R              | Ser76 or Thr80                             |
| T5   | 657.3                                     | 3+           | 280           | 295         | PQCPVGFNTLAFPSM <b>K</b>               | Thr288 and Ser293                          |
| T5   | 985.4                                     | 2+           | 280           | 295         | PQCPVGFNTLAFPSM <b>K</b>               | Thr288 and Ser293                          |
| T5   | 1063.5                                    | 2+           | 280           | 295         | PQCPVGFNTLAFPSM <b>K</b>               | Thr288 and Ser293                          |
| T6   | 918.1                                     | 3+           | 273           | 295         | QEINAARQCPVGFNTLAFPSM <b>K</b>         | Thr288 and Ser293                          |
| T6   | 1150.5                                    | 3+           | 105           | 136         | STESPIDFVVDTVPGSQNSDTQSVQSTIS <b>R</b> | Any 1 Ser or Thr                           |
| T6   | 630.6                                     | 3+           | 280           | 295         | PQCPVGFNTLAFPSM <b>K</b>               | Thr288                                     |
| T6   | 945.4                                     | 2+           | 280           | 295         | PQCPVGFNTLAFPSM <b>K</b>               | Thr288                                     |
| T6   | 1023.5                                    | 2+           | 280           | 295         | PQCPVGFNTLAFPSM <b>K</b>               | Thr288                                     |
| T7   | 668.8                                     | 4+           | 273           | 295         | QEINAARQCPVGFNTLAFPSM <b>K</b>         | Thr288                                     |
| T7   | 891.4                                     | 3+           | 273           | 295         | QEINAARQCPVGFNTLAFPSM <b>K</b>         | Thr288                                     |
| T7   | 1336.6                                    | 2+           | 273           | 295         | QEINAARQCPVGFNTLAFPSM <b>K</b>         | Thr288                                     |
| T7   | 943.5                                     | 3+           | 273           | 295         | QEINAARQCPVGFNTLAFPSM <b>K</b>         | Thr288                                     |
| T7   | 1150.5                                    | 3+           | 105           | 136         | STESPIDFVVDTVPGSQNSDTQSVQSTIS <b>R</b> | Any 1 Ser or Thr                           |
| T7   | 945.4                                     | 2+           | 280           | 295         | PQCPVGFNTLAFPSM <b>K</b>               | Thr288                                     |
| T8   | 831                                       | 3+           | 84            | 104         | AQTVVVEYTHDSNTDMFQIGR                  | Thr86                                      |
| T8   | 1246.1                                    | 2+           | 84            | 104         | AQTVVVEYTHDSNTDMFQIGR                  | Thr86                                      |
| T8   | 836.4                                     | 3+           | 84            | 104         | AQTVVVEYTHDSNTDM <b>F</b> QIGR         | Thr86                                      |
| T8   | 1254.1                                    | 2+           | 84            | 104         | AQTVVVEYTHDSNTDM <b>F</b> QIGR         | Thr86                                      |
| T8   | 1150.9                                    | 3+           | 105           | 136         | STESPIDFVVDTVPGSQNSDTQSVQSTIS <b>R</b> | Any 1 Ser or Thr                           |
| T9a  | 886.1                                     | 3+           | 273           | 295         | QEINAARQCPVGFNTLAFPSM <b>K</b>         | Thr288                                     |
| T9a  | 1328.6                                    | 2+           | 273           | 295         | QEINAARQCPVGFNTLAFPSM <b>K</b>         | Thr288                                     |
| T9a  | 891.4                                     | 3+           | 273           | 295         | QEINAARQCPVGFNTLAFPSM <b>K</b>         | Thr288                                     |
| T9a  | 1336.6                                    | 2+           | 273           | 295         | QEINAARQCPVGFNTLAFPSM <b>K</b>         | Thr288                                     |
| T9a  | 863.1                                     | 4+           | 105           | 136         | STESPIDFVVDTVPGSQNSDTQSVQSTIS <b>R</b> | Any 1 Ser or Thr                           |
| T9a  | 1150.5                                    | 3+           | 105           | 136         | STESPIDFVVDTVPGSQNSDTQSVQSTIS <b>R</b> | Any 1 Ser or Thr                           |
| T9a  | 1725.3                                    | 2+           | 105           | 136         | STESPIDFVVDTVPGSQNSDTQSVQSTIS <b>R</b> | Any 1 Ser or Thr                           |
| T9a  | 937.4                                     | 2+           | 280           | 295         | PQCPVGFNTLAFPSM <b>K</b>               | Thr288                                     |
| T9a  | 945.4                                     | 2+           | 280           | 295         | PQCPVGFNTLAFPSM <b>K</b>               | Thr288                                     |
| T9b  | 1150.5                                    | 3+           | 105           | 136         | STESPIDFVVDTVPGSQNSDTQSVQSTIS <b>R</b> | Any 1 Ser or Thr                           |
| T9b  | 945.4                                     | 2+           | 280           | 295         | PQCPVGFNTLAFPSM <b>K</b>               | Thr288                                     |

Identification by LCMS of the major phosphopeptides and phosphorylation sites in Peaks 1-9 from Fig 4.

(A) Analysis of Peaks 1-9 in Fig 4A which were obtained by tryptic digestion of wild-type Pellino 1 that had been phosphorylated by IRAK4. (B) Analysis of Peaks 1-9 in Fig 4C which were obtained by tryptic digestion of wild-type Pellino 1 that had been phosphorylated by IRAK1. Phosphorylated residues are shown in bold, methionine sulfoxide is indicated by M\* and methionine sulphone by M\*\*.
